# Supplementary material
Source: PubMed Central journal article supplement (PMC4109991)
Supplement: NIHMS463148-supplement-01.pdf [file NIHMS463148-supplement-01.pdf]

marker Olig2. **(g-h and o-p)** Expression of the neural progenitor cell marker Nestin. Scale bars represent 200  $\mu\text{m}$ .

**Figure 6. All gliomas demonstrate MAPK pathway activation and high levels of proliferation. (A-D)** Confirmation of MAPK activation. IHC for P-Erk confirmed MAPK activation in all gliomas induced with either KRas<sup>G12D</sup> or BRAF<sup>V600E</sup>. **(e-h)** Analysis of tumor vasculature. IHC for the endothelial cell marker endomucin highlights the highly abnormal vasculature of Akt/KRas<sup>G12D</sup> gliomas compared with the other tumor samples. **(i-l)** Assessment of mitotic activity. IHC for the cell division marker Ki67 demonstrates that all of the tumors are highly proliferative. Scale bars represent 200  $\mu\text{m}$ .

**Figure S1. Schematic representation of the viral vector used in this study.** This vector is Gateway compatible to allow for the easy insertion of experimental sequences. LTR, long terminal repeat;  $\Psi$ , packaging signal; SD, splice donor; SA, splice acceptor.

**Figure S2. BRAF expression in GBM cell lines and mouse Astrocytes.** Analysis of BRAF expression in Human GBM cell lines and mouse astrocyte cell lines infected with RCASBP(A)BRAF<sup>V600E</sup> and Cre revealed BRAF expression to be at lower or similar levels to those seen in the 9 Human GBM cell lines analyzed. Lane 1) Mouse astrocytes infected with RCASBP(A)BRAF<sup>V600E</sup> and Cre; Lane 2) Mouse astrocytes infected with RCASBP(A)GFP; Lanes 3-11) Human GBM cell lines. Lane 3) U87; Lane 4) LN18; Lane 5) SNB19; Lane 6) TG98; Lane 7) SF295; Lane 8) SF268; Lane 9) LN229; Lane 10) U251; and Lane 11) U373.

**Figure S3. KRas or BRAF activation induces anchorage-independent growth of astrocytes *in vitro* when combined with *Ink4a/Arf* loss or Akt activation.** Astrocytes from N-TVA/*Ink4a/Arflox/lox* mice were infected with viruses containing the indicated genes to evaluate

the ability of *KRas*<sup>G12D</sup> and *BRAF*<sup>V600E</sup> to induce anchorage independent growth in soft agar in combination with *Cre* or *Akt*. The astrocytes were also infected with RCASBP(A)GFP as control. Colony formation was assessed after 7 days by counting ten fields at 100 x magnification. Each condition was performed in triplicate and the data represent mean  $\pm$  SE. Representative images are shown.

**Figure S4. BRAFV600E tumors express the glial marker S100 in the context of Akt activation but not in the context of *Ink4a/Arf* loss. (a) *BRAF*<sup>V600E</sup> + Akt (b) *BRAF*<sup>V600E</sup> + Cre.** Scale bars represent 200  $\mu$ m.

**Figure S5. BRAFV600E tumors do not express the neuroendocrine cell marker Synaptophysin. (a) *BRAF*<sup>V600E</sup> + Akt (b) *BRAF*<sup>V600E</sup> + Cre.** Scale bars represent 200  $\mu$ m.
